# Supplementary material
Source: Springer Nature journal article supplement (https://www.springermedizin.de/resource/supplementary/13063_2013_1498_MOESM3_ESM.pdf/9620168)

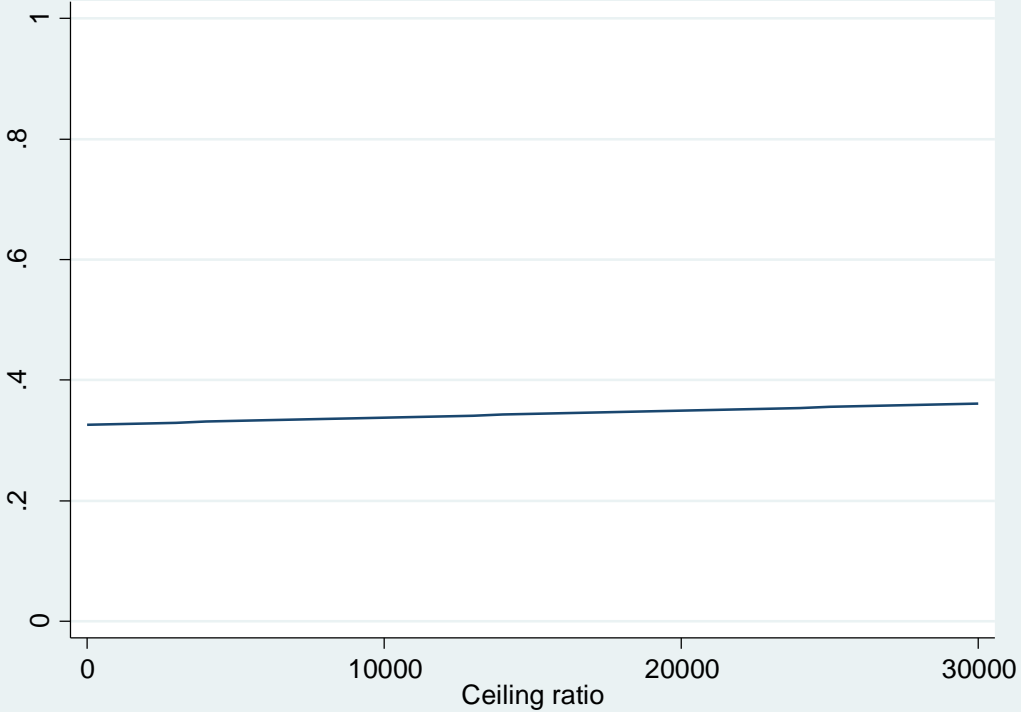

Willingness to pay (€ per QALY gained)

Supplement: MOESM3 [file 9620168]
